# Supplementary material for: Different associations between intelligence and social cognition in children with and without autism spectrum disorders
Source: PLoS One. 2020 Aug 21;15(8):e0235380. doi: 10.1371/journal.pone.0235380 (PMC7444496; doi:10.1371/journal.pone.0235380)
Supplement: S2 Data — (XLS) [file pone.0235380.s002.xls]

## Sheet: Sheet1
1	1	1	62	13	10	10	14	11	13	8	8	7	24	18	8	12		16	14	14			13	14	14	12		121	92	122		44	53	97	335	129	122	132	116	23	38	61	50	7	10	5	6	4	32
1	1	1	67	10	8	9	10	4	9	3	5	9	19	10	6	3		11	10	12			9	5	9	13		73	80	83		33	36	69	236	107	94	99	76	18	23	41	35	1	4	8	4	1	18
1	1	0	75	10	7	11	12	12	13	8	8	14	20	18	17	12	7	10	6	13			11	12	10	18		110	113	112	107	29	51	80	442	98	118	111	114	17	37	54	55	6	7	8	7	1	29
1	1	1	65	2	0	6	10	9	14	4	5	9	18	14	8	0		4	1	8			14	7	9	13		105	90	72		13	43	56	267	66	105	86	87	2	33	35	40	8	8	10	7	1	34
1	1	0	62	7	7	6	13	9	6	5	6	10	21	14	11	12		9	9	9			7	9	10	15		111	105	122		27	41	68	338	94	102	98	117	14	28	42	46	0	1	0	2	0	3
1	1	1	65	10	7	5	13	8	12	6	2	7	16	10	9	2		12	8	7			12	10	6	11		90	94	81		27	39	66	265	94	99	96	86	17	33	50	35	2	6	2	3	1	14
1	1	1	60	13	11	11	13	10	14	10	2	7	20	13	7	7		16	15	16			15	18	7	12		107	90	112		47	52	99	309	135	120	134	104	24	37	61	40	7	11	12	8	9	47
1	1	0	68	5	9	9	10	7	9	6	2	3	14	11	8	4		6	12	12			9	10	6	5		78	87	88		30	30	60	253	100	84	90	82	14	26	40	33	11	15	14	8	4	52
1	1	0	73	7	5	5	11	10	12	5	5	7	16	14	4	12	6	7	4	6			10	7	8	9		86	72	114	106	17	34	51	378	74	91	81	93	12	33	45	34	1	1	6	5	2	15
1	1	0	60	8	8	8	14	8	14	6	6	8	19	13	8	5		10	12	12			15	11	11	13		107	94	102		34	50	84	303	109	117	116	101	16	36	52	40	4	6	5	5	1	21
1	1	1	73	11	6	8	14	11	7	7	8	6	19	20	13	12	6	11	5	10			6	10	11	8		118	101	114	106	26	35	61	439	92	92	91	113	17	32	49	52	5	7	4	6	1	23
1	1	0	71	9	9	7	14	12	14	6	3	7	20	17	7	8		10	11	9			13	9	6	10		111	80	101		30	38	68	292	100	97	98	97	18	40	58	44	4	4	5	5	0	18
1	1	1	68	15	8	10	13	13	13	10	9	9	18	12	2	3		17	10	13			12	15	13	13		80	71	80		40	53	93	231	121	122	127	75	23	39	62	32	7	9	6	4	3	29
1	1	1	75	6	9	11	11	11	14	15	6	12	21	19	12	12	2	6	10	13			12	19	8	15		115	95	112	86	29	54	83	408	98	123	114	102	15	36	51	52	7	3	4	4	0	18
1	1	1	74	5	8	5	9	6	9	9	10	7	22	19	13	12	5	5	8	6			7	13	12	9		115	99	112	98	19	41	60	424	78	102	90	108	13	24	37	54	7	3	6	1	5	22
1	1	0	60	9	6	9	9	13	12	8	6	10	17	15	9	6		11	7	13			13	14	11	15		117	99	107		31	53	84	323	102	122	116	110	15	34	49	41	1	1	2	0	1	5
1	1	1	75	7	6	9	13	8	15	6	6	12	23	17	13	5	3	7	5	10			13	9	8	15		103	99	79	90	22	45	67	371	84	109	97	91	13	36	49	53	3	5	8	2	0	18
1	1	1	75	14	8	11	12	11	13	10	11	9	21	18	8	8	7	14	8	13			11	14	14	11		110	80	94	107	35	50	85	391	111	117	117	97	22	36	58	47	4	2	5	5	4	20
1	1	0	65	10	5	7	12	8	8	8	5	10	15	14	6	5		12	5	10			8	3	9	15		105	82	96		27	45	72	283	94	109	102	93	15	28	43	35	6	4	2	7	0	19
1	1	1	68	10	12	13	14	12	11	10	7	12	21	19	13	6		11	15	16			10	15	10	16		119	106	95		42	51	93	320	125	118	127	109	22	37	59	53	6	4	2	7	2	21
1	1	1	66	14	9	11	13	9	11	8	5	8	18	13	10	2		16	12	14			10	13	9	12		93	96	78		42	44	86	267	125	107	118	87	23	33	56	41	3	3	14	4	2	26
1	1	1	61	12	5	7	12	7	15	5	5	9	18	16	10	11		15	6	11			16	10	9	14		119	103	122		32	49	81	344	105	115	112	121	17	34	51	44	6	7	5	4	0	22
1	1	1	62	9	9	8	13	6	14	6	5	9	23	17	15	1		11	13	11			14	11	9	14		119	120	78		35	48	83	317	111	113	114	107	18	33	51	55	6	3	10	2	1	22
1	1	0	72	13	9	9	12	10	9	7	9	8	20	20	12	12	7	14	11	11			8	10	12	11		118	97	114	110	36	41	77	439	113	102	108	113	22	31	53	52	4	1	4	7	0	16
1	1	1	65	11	11	10	13	11	7	6	10	10	19	18	12	8		13	14	14			7	10	16	15		120	106	110		41	48	89	336	123	113	122	116	22	31	53	49	4	5	4	2	0	15
1	1	1	60	10	10	12	11	5	8	5	7	7	17	17	7	18		12	14	17			9	10	12	12		120	90	140		43	43	86	350	127	105	118	124	20	24	44	41	3	5	3	7	2	20
1	1	1	91	18	12	13	10	13	16	12	14	11	24	25	16	31	16	16	13	13			12	14	13	11		117	96	142	119	42	50	92	474	125	117	125	127	30	39	69	65	7	4	7	4	0	22
1	1	0	76	13	9	10	12	8	11	8	9	10	19	18	12	15	8	13	10	11			9	11	11	12		106	93	118	108	34	43	77	425	109	105	108	108	22	31	53	49	1	0	0	6	0	7
1	1	1	70	15	9	12	12	11	13	11	6	6	24	18	16	12		16	11	15			12	17	9	8		115	114	116		42	46	88	345	125	110	120	121	24	36	60	58	8	8	8	3	1	28
1	1	1	70	9	9	7	12	8	12	8	10	9	22	19	14	8		10	11	9			11	12	14	12		118	107	101		30	49	79	326	100	115	110	112	18	32	50	55	12	11	13	5	3	44
1	1	1	69	10	7	6	15	9	15	8	9	9	21	14	15	4		11	7	8			14	12	13	13		95	113	85		26	52	78	293	92	120	109	97	17	39	56	50	7	2	5	2	3	19
1	1	1	77	11	10	9	12	13	15	6	7	6	23	18	15	11	3	11	12	10			13	8	9	7		106	105	104	87	33	37	70	402	107	95	100	100	21	40	61	56	5	11	5	5	6	32
1	1	0	66	12	10	10	10	9	3	7	8	6	13	18	8	12		13	13	13			4	11	12	9		119	87	120		39	36	75	326	119	94	105	112	22	22	44	39	5	6	9	5	1	26
1	1	0	79	11	6	7	13	11	15	5	6	4	21	14	11	7	4	10	5	8			13	6	8	4		75	88	81	88	23	31	54	332	86	86	84	80	17	39	56	46	6	3	5	4	0	18
1	1	1	60	6	5	5	12	9	11	5	5	9	18	12	11	8		8	6	8			12	10	9	14		101	107	115		22	45	67	323	84	109	97	110	11	32	43	41	7	9	18	9	5	48
1	1	0	62	7	6	8	13	10	14	7	7	8	22	19	13	13		9	7	11			14	12	12	13		123	112	123		27	51	78	358	94	118	109	128	13	37	50	54	5	8	7	6	1	27
1	1	0	62	6	7	6	13	10	10	7	1	10	16	7	9	0		8	9	9			10	12	5	15		69	96	74		26	42	68	239	92	104	98	77	13	33	46	32	1	1	0	0	0	2
1	1	1	77	12	7	11	15	13	16	6	10	12	20	16	11	10	5	12	6	12			14	8	12	14		92	89	100	95	30	48	78	376	100	113	109	92	19	44	63	47	4	7	10	10	4	35
1	1	1	61	5	6	5	11	6	10	4	0	2	9	9	10	0		7	7	8			11	8	4	5		79	103	76		22	28	50	258	84	81	80	84	11	27	38	28	5	8	10	10	4	37
1	1	0	75	11	10	12	14	12	14	8	4	11	20	20	9	14	9	11	12	14			12	12	7	14		117	84	118	115	37	45	82	434	115	109	113	111	21	40	61	49	3	3	1	4	0	11
1	1	1	69	8	7	9	12	12	10	8	6	12	19	16	7	8		9	7	11			9	12	9	16		110	82	105		27	46	73	297	94	110	103	99	15	34	49	42	8	13	16	9	2	48
1	1	1	61	13	10	11	12	7	14	5	4	7	19	15	10	11		16	14	16			15	10	8	12		117	103	122		46	45	91	342	133	109	124	119	23	33	56	44	7	9	13	9	5	43
1	1	0	63	12	8	7	13	10	13	9	6	5	14	11	10	1		14	11	10			13	15	10	9		119	101	78		35	47	82	298	111	112	113	99	20	36	56	35	6	4	6	6	0	22
1	1	1	76	13	8	11	13	10	17	10	12	13	22	20	19	14	6	13	8	12			15	13	15	16		115	119	115	100	33	59	92	449	107	131	125	117	21	40	61	61	3	5	6	7	3	24
1	1	1	62	7	6	10	10	7	10	3	4	6	20	15	13	3		9	7	14			10	6	8	10		116	112	89		30	34	64	317	100	91	94	107	13	27	40	48	11	11	26	13	9	70
1	1	0	71	13	8	14	13	9	9	9	10	14	17	20	8	13		14	9	17			8	13	14	19		120	84	119		40	54	94	323	121	123	128	110	21	31	52	45	12	14	19	10	6	61
1	1	1	70	12	8	9	12	12	14	8	9	10	23	20	15	12		13	9	11			13	12	13	13		120	111	116		33	51	84	347	107	118	116	122	20	38	58	58	5	2	9	6	0	22
1	1	1	67	10	7	8	14	8	12	4	5	7	20	16	13	1		11	8	11			11	7	9	11		112	108	73		30	38	68	293	100	97	98	97	17	34	51	49	6	5	10	7	1	29
1	1	1	75	8	7	9	14	7	13	7	7	8	22	18	13	17	5	8	6	10			11	10	9	10		110	99	123	98	24	40	64	430	88	100	94	110	15	34	49	53	2	2	0	1	0	5
1	1	1	60	5	5	5	12	7	8	6	4	10	15	14	9	0	0	7	6	8			9	11	8	15		113	99	76		21	43	64	288	82	105	94	95	10	27	37	38	11	5	7	6	4	33
1	1	0	84	12	9	11	12	13	10	9	9	9	21	19	14	12	6	11	9	11			7	11	9	10		97	94	93	88	31	37	68	372	102	95	98	91	21	35	56	54	5	2	3	4	0	14
1	1	0	64	4	6	5	12	10	12	4	7	1	15	12	5	3		6	6	7			12	7	11	4		90	78	86		19	34	53	254	78	91	83	82	10	34	44	32	4	9	13	10	2	38
1	1	0	66	16	10	10	12	9	6	7	14	9	19	22	9	17		18	13	13			6	11	19	13		126	92	127		44	49	93	345	129	115	127	121	26	27	53	50	1	4	8	8	0	21
1	1	0	77	14	9	10	11	12	11	9	8	11	20	20	11	20	6	14	10	11			9	12	10	13		115	89	125	100	35	44	79	429	111	107	110	109	23	34	57	51	6	3	9	3	1	22
1	1	1	68	11	9	10	9	9	8	6	0	9	14	17	10	12		12	12	13			7	9	4	13		115	93	119		37	33	70	327	115	89	100	112	20	26	46	41	6	4	2	5	0	17
1	1	1	62	11	10	7	12	9	16	9	6	7	21	18	13	15		13	14	10			17	15	10	12		121	112	125		37	54	91	358	115	123	124	128	21	37	58	52	6	5	4	1	1	17
2	2	1	78	15	11	8	14	11	5	5	1	4	18	17	8	12	6	15	13	9			4	6	4	4		94	78	105	97	37	18	55	374	115	65	85	92	26	30	56	43	14	18	16	11	10	69
2	2	1	89	8	8	10	12	8	11	5	7	7	19	16	11	16	9	6	6	10			7	5	7	6		73	80	103	95	22	25	47	351	84	76	78	85	16	31	47	46	11	15	34	16	23	99
2	2	0	66	8	8	7	12	15	12	7	4	6	13	9	8	1		9	10	9			11	11	8	9		70	87	73		28	39	67	230	96	99	97	74	16	39	55	30	5	16	24	10	21	76
2	2	1	75	13	6	7	12	6	10	11	11	10	21	15	12	13	5	13	5	8			8	16	14	13		88	95	115	98	26	51	77	396	92	118	108	98	19	28	47	48	10	16	10	2	19	57
2	2	1	80	16	7	6	15	11	15	8	7	13	20	17	5	17	8	16	6	6			12	10	8	15		90	71	119	102	28	45	73	382	96	109	103	94	23	41	64	42	13	18	27	15	14	87
2	2	0	63	10	6	6	10	8	12	5	6	4	17	4	7	0		7	7	9			12	9	10	7		67	87	74		23	38	61	228	86	97	91	74	16	30	46	28	11	20	27	16	6	80
2	2	1	72	6	6	7	9	3	14	6	3	7	18	11	9	3	0	6	5	8			12	9	6	9		70	85	74	79	19	36	55	308	78	94	85	74	12	26	38	38	10	14	22	6	18	70
2	2	1	74	5	6	5	7	2	6	4	0	3	19	14	6	12	2	5	5	6			5	6	3	4		81	75	112	86	72	65	68	86	72	65	68	86	11	15	26	39	9	23	25	14	21	92
2	2	1	76	14	11	11	12	9	11	7	9	10	20	19	13	16	7	14	13	12			9		11	12		112	97	120	104	39	41	80	433	119	109	111	111	25	32	57	52	5	6	15	4	3	33
2	2	1	76	12	10	11	11	6	7	10	8	14	19	19	13	14	4	12	12	12			6	13	10	7		112	97	115	91	36	46	82	415	113	110	113	105	22	24	46	51	6	13	23	17	5	64
2	2	1	98	11	8	8	15	8	15	8	7	8	20	19	4	18	7	8	5	7			10	8	6	6		76	60	90	77	20	30	50	303	80	84	80	73	19	38	57	43	11	23	28	8	20	90
2	2	1	69	9	0	6	0	4	0	7	8	6	0	6	0	0		10	1	8			2	11	12	9		67	68	68		19	34	53	203	78	91	83	66	9	4	13	6	6	8	18	12	5	49
2	2	1	84	7	8	8	13	11	14	8	9	9	22	17	12	12	2	6	7	8			11	10	9	10		84	86	93	77	21	40	61	340	82	100	91	83	15	38	53	51	11	10	14	5	15	55
2	2	1	63	7	9	9	12	5	6	8	5	7	17	12	14	8		9	13	13			7	14	9	12		95	116	113		35	42	77	324	111	104	108	111	16	23	39	43	8	14	29	28	23	102
2	2	1	67	6	9	4	9	8	11	6	5	4	19	19	10	13		7	12	5			10	10	9	6		120	96	121		24	35	59	337	88	92	89	117	15	28	43	48	5	3	9	3	8	28
2	2	0	71	6	8	6	11	12	12	8	8	8	19	17	10	12		7	9	7			11	12	11	11		111	91	116		23	45	68	318	86	109	98	108	14	35	49	46	14	22	36	21	15	108
2	2	1	62	2	5	4	10	7	9	0	0	0	14	11	2	5		4	5	6			9	4	4	3		88	72	99		15	20	35	259	70	68	68	84	7	26	33	27	10	16	27	6	13	72
2	2	1	67	5	8	6	11	8	14	12	4	6	16	9	2	3		6	10	8			14	19	8	9		70	71	83		24	50	74	224	88	117	104	72	13	33	46	27	10	14	22	6	10	62
2	2	1	66	5	4	1	7	8	10	4	3	4	9	3	5	0		6	4	2			9	7	7	6		66	77	70		12	29	41	213	64	82	73	69	9	25	34	17	7	11	13	8	3	42
2	2	1	60	8	0	9	5	8	4	5	0	0	16	11	0	12		10	1	13			5	10	4	3		93	70	123		24	22	46	286	88	71	77	94	8	17	25	27	11	16	26	6	10	69
2	2	1	68	1	3	5	10	1	8	3	0	0	13	6	0	4		3	3	6			7	5	4	3		67	68	85		12	19	31	220	64	66	66	71	4	19	23	19	12	20	26	9	12	79
2	2	0	85	16	10	12	13	11	14	8	13	10	23	21	23	13	7	15	11	12			11	10	13	11		109	126	98	92	38	45	83	425	117	109	114	108	26	38	64	67	9	11	12	5	9	46
2	2	1	83	11	11	8	12	10	11	7	9	6	24	18	16	12	7	10	13	8			8	8	9	6		94	103	97	95	31	31	62	389	102	86	92	96	22	33	55	58	12	20	46	23	28	129
2	2	0	63	11	6	7	4	4	0	6	3	5	21	17	10	7		13	7	10			3	11	7	9		119	101	109		30	30	60	329	100	84	90	113	17	8	25	48	12	19	24	14	18	87
2	2	0	73	15	12	14	11	11	16	12	11	10	23	20	20	12	7	16	14	17			15	18	15	13		118	128	114	110	47	61	108	470	135	135	146	125	27	38	65	63	11	14	17	10	7	59
2	2	0	62	8	7	6	13	7	6	4	2	3	19	14	8	9		10	9	9			7	8	6	6		111	92	116		28	27	55	319	96	79	85	108	15	26	41	41	8	6	23	12	10	59
2	2	0	65	11	8	16	10	8	11	9	12	6	17	17	9	12		13	11	19			11	15	19	10		118	94	123		43	55	98	335	127	125	133	116	19	29	48	43	6	3	6	3	0	18
2	2	1	85	6	8	3	13	8	13	6	3	3	17	16	7	4	1	5	7	2			10	7	5	3		77	73	65	75	14	25	39	290	68	76	71	70	14	34	48	40	16	20	36	11	18	101
2	2	1	63	6	7	9	9	7	5	6	5	5	23	14	9	12		8	9	13			6	11	9	9		111	96	122		30	35	65	329	100	92	95	113	13	21	34	46	8	8	17	10	7	50
2	2	1	69	6	8	9	9	10	7	7	5	7	17	12	12	1		7	10	11			7	11	8	10		80	102	71		28	36	64	253	96	94	94	82	14	26	40	41	9	13	27	9	12	70
2	2	0	64	6	8	6	13	10	8	5	0	6	19	14	15	8		7	11	8			8	9	4	10		105	117	110		26	31	57	332	92	86	87	114	14	31	45	48	9	12	20	9	13	63
2	2	1	96	10	12	10	12	9	13	8	7	6	24	19	21	17	9	7	12	9			8	8	6	5		79	109	90	85	28	27	55	363	96	79	85	89	22	34	56	64	9	16	22	14	15	76
2	2	1	69	11	8	6	13	6	9	7	8	7	16	14	1	12		12	10	8			8	11	12	10		95	70	119		30	41	71	284	100	102	101	93	19	28	47	31	11	14	31	13	15	84
2	2	1	74	4	7	6	11	8	10	5	7	7	20	17	11	8	3	5	6	7			8	7	9	9		103	91	94	90	18	33	51	378	76	89	81	93	11	29	40	48	6	6	18	10	8	48
2	2	1	65	5	6	5	13	7	10	8	3	10	19	14	7	4		7	6	7			10	13	7	15		105	85	91		20	45	65	281	80	109	95	92	11	30	41	40	17	13	21	7	17	75
2	2	1	68	12	10	10	11	10	11	9	7	10	23	17	12	12		13	13	13			10	14	10	14		115	102	119		39	48	87	336	119	113	119	116	22	32	54	52	4	3	6	3	3	19
2	2	1	71	11	7	12	15	10	14	10	8	7	23	19	14	10		12	7	15			13	15	11	10		118	107	110		34	49	83	335	109	115	114	116	18	39	57	56	11	8	18	7	13	57
2	2	1	97	12	8	9	14	12	14	11	12	11	21	20	15	20	11	9	6	8			9	12	10	10		84	87	103	93	23	41	64	367	86	102	94	90	20	40	60	56	13	29	30	19	22	113
2	2	1	66	3	4	4	11	8	11	6	2	2	18	13	12	5		5	4	5			10	10	6	4		93	104	93		14	30	44	290	68	84	75	96	7	30	37	43	10	16	21	4	10	61
2	2	1	60	0	3	0	2	0	4	4	1	0	10	5	2	3		3	4	1			5	8	6	3		68	73	92		8	22	30	233	56	71	65	75	3	6	9	17	11	12	20	5	11	59
2	2	0	79	8	8	5	13	11	10	6	11	2	21	13	10	12	2	8	8	5			8	7	13	3		71	84	105	81	21	31	52	341	82	86	82	83	16	34	50	44	12	20	39	17	23	111
2	2	1	78	10	5	6			15	9	7	4	20	13	10	14	7	9	4	6			13	12	9	4		71	84	113	101	19	38	57	369	78	97	87	90	15	15	30	43	7	20	19	10	12	68
2	2	0	70	8	5	6	9	12	14	8	0	0	15	10	6	12		9	4	7			13	12	3	2		69	77	116		20	30	50	262	80	84	80	85	13	35	48	31	9	15	23	22	17	86
2	2	1	81	15	8	8	14	12	10	9	11	7	22	18	7	10	5	14	7	8			7	12	12	8		97	74	92	89	29	39	68	352	98	99	98	86	23	36	59	47	12	17	32	17	23	101
2	2	1	79	2	1	1	7	3	5	5	0	0	11	0	0	1	0	3	1	1			4	6	3	2		62	61	65	76	5	15	20	264	50	60	59	64	3	15	18	11	8	22	24	11	10	75
2	2	1	94	12	9	9	14	12	11	7	15	11	18	22	14	16	8	9	7	8			6	7	14	11		99	85	90	84	24	38	62	358	88	97	92	87	21	37	58	54	9	13	26	13	11	72
[truncated: 6 more columns]
